# Supplementary material for: Dental Emergencies in an Italian Pediatric Hospital during the COVID-19 Pandemic
Source: Healthcare (Basel). 2022 Mar 15;10(3):537. doi: 10.3390/healthcare10030537 (PMC8949433; doi:10.3390/healthcare10030537)
Supplement: Supplementary file 1 [file healthcare-10-00537-s001.zip › healthcare-1628654-supplementary.pdf]

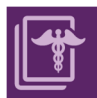

Supplementary Materials

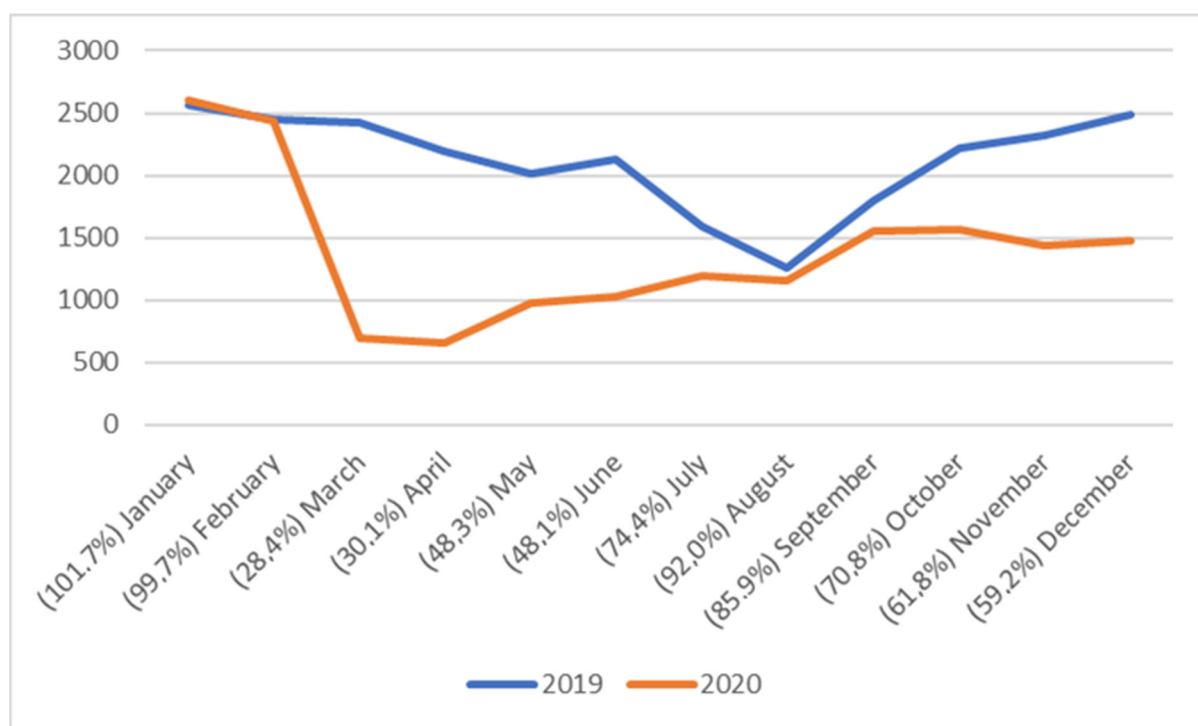

**Figure S1.** Represents the number of overall ER visits in 2019 (blue) and 2020 (red). In brackets, the proportion of 2020 over 2019.

**Table S1.** Hospital emergencies. Number and proportion (on the total per year) of the different general reasons for visiting the ER in 2019 and 2020.

| Hospital emergencies                            | 2019         | 2020         |
|-------------------------------------------------|--------------|--------------|
| Respiratory and ear, nose and throat conditions | 7815 (30.7%) | 3242 (19.4%) |
| Trauma/injuries                                 | 3452 (13.6)  | 3007 (18.0%) |
| Gastrointestinal infections                     | 2407 (9.5%)  | 831 (5.0%)   |
| Aspecific pain/headache                         | 1751 (6.9%)  | 1096 (6.5%)  |
| Fever/seizures                                  | 653 (2.6%)   | 585 (3.5%)   |
| Paediatric exanthematous diseases               | 562 (2.2%)   | 218 (1.3%)   |
| Allergies/rush                                  | 338 (1.3%)   | 123 (0.7%)   |
| Other                                           | 8457 (33.2%) | 7648 (45.7%) |
| Total                                           | 25436 (100%) | 16750 (100%) |

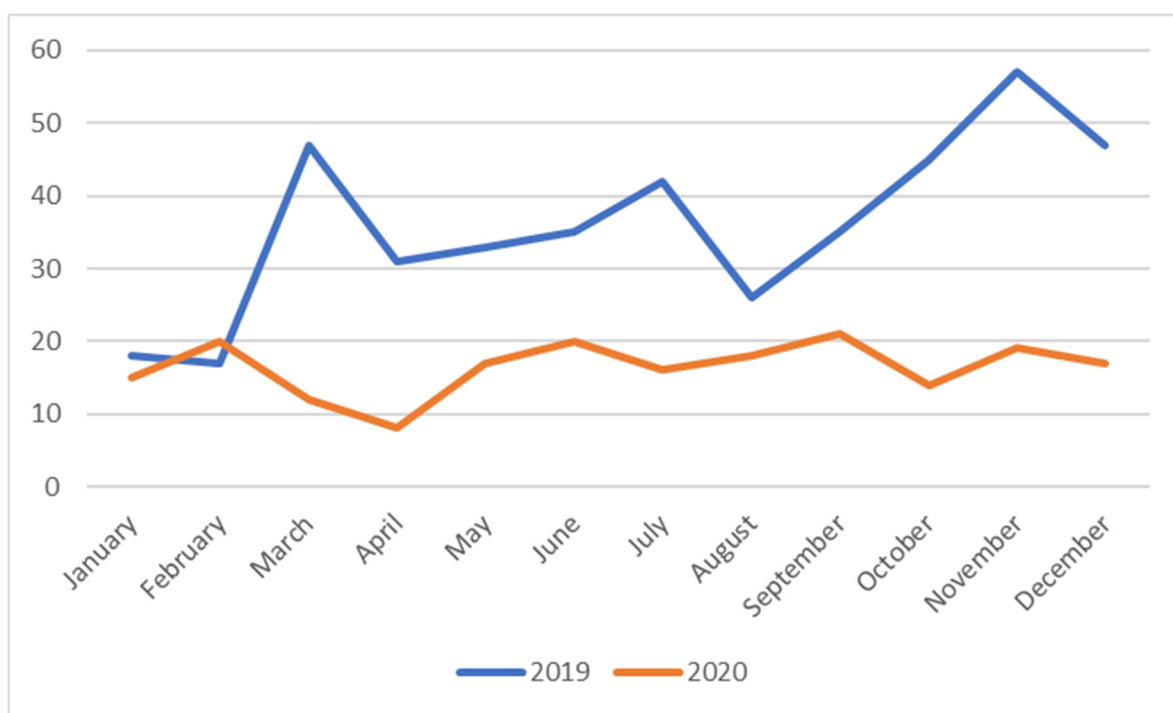

**Figure S2.** represents the trend for oral ER visits in 2019 (blue) and 2020 (red).

**Table S2.** Oral emergencies. Reasons for visiting the ER for oral complaints in 2019 and 2020 (number and proportion on the total per year).

| Oral emergencies               | 2019        | 2020        |
|--------------------------------|-------------|-------------|
| Stomatitis/aphthous stomatitis | 156 (36.0%) | 30 (15.2%)  |
| Trauma                         | 76 (17.6%)  | 21 (10.7%)  |
| Infections/abscesses           | 32 (7.4%)   | 19 (9.6%)   |
| Painful caries                 | 32 (7.4%)   | 10 (5.1%)   |
| Other                          | 137 (31.6%) | 117 (59.4%) |
| Total                          | 433 (100%)  | 197 (100%)  |
